# Supplementary material for: Human genetic structure in Northwest France provides new insights into West European historical demography
Source: PubMed Central journal article supplement — Nat Commun. 2024 Aug 7;15:6710. doi: 10.1038/s41467-024-51087-1 (PMC11306750; doi:10.1038/s41467-024-51087-1), 2024-08-07
Supplement: 41467_2024_51087_MOESM3_ESM.pdf [file 41467_2024_51087_MOESM3_ESM.pdf]

## **Description of Additional Supplementary Files**

File Name: Supplementary Data 1

Description: Outgroup  $f_3$ -statistics of the form  $f_3(\text{Mbuti}; \text{Source 1}, \text{Source 2})$ . Only the top 5 values are shown.

File Name: Supplementary Data 2

Description:  $f_4$ -statistics of the form  $f_4(\text{Mbuti}; \text{ancient EUR sample (X)}; \text{sLoire\_France\_4-6th (Y)}, \text{sLoire\_France\_6-7th (Z)})$

File Name: Supplementary Data 3

Description: qpAdm results for one-way and two-way models used to estimate the ancestry of Mediaeval and present-day individuals from France.
